# Supplementary material for: Partner, Neighbor, Housekeeper and Dimension: 3D versus 2D Glomerular Co-Cultures Reveal Drawbacks of Currently Used Cell Culture Models
Source: MDPI journal article supplement (doi:10.3390/ijms241210384), 2023-06-20
Supplement: s1 [file s1]

## Supplementary data

**Supplementary Video S1:** *Representative video of glomerular co-culture in 3D over a time course of four days.*

Podocytes are labeled in blue (eBioscience™ Cell Proliferation Dye eFluor™ 450), glomerular endothelial cells are labeled in red (tdTomato-Farnesyl-reporter line) and mesangial cells are labeled in green (eBioscience™ CFSE).

**Supplementary Video S2:** *3D reconstruction and animation of multiphoton images of glomerular co-culture in 3D.* Podocytes are labeled in blue, glomerular endothelial cells are labeled in magenta and mesangial cells are labeled in green.

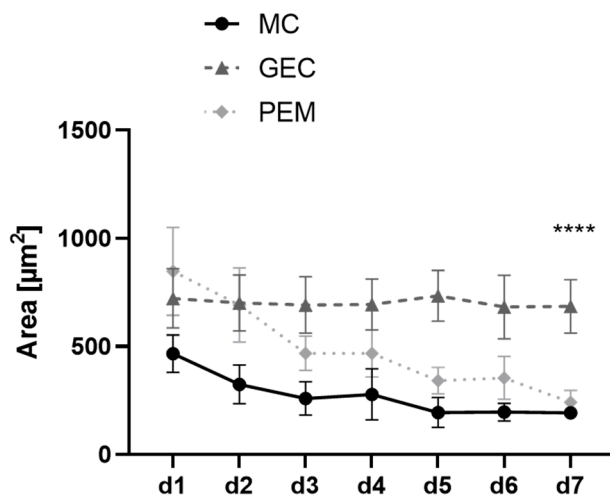

**Supplementary Figure S1:** *Dynamic changes of spheroid size over time.* Area of mesangial cell spheroids, glomerular endothelial cell spheroids and glomerular co-culture spheroids plotted against days. Data are presented as mean  $\pm$  SD ( $n = 10$ ). Data are given as mean  $\pm$  SEM, \*\*\*\*  $p < 0.0001$  GEC compared to MC or PEM spheroids. MC: mesangial cells, GEC: glomerular endothelial cells, PEM: co-culture of glomerular endothelial cells, mesangial cells and differentiated conditionally immortalized human podocytes.

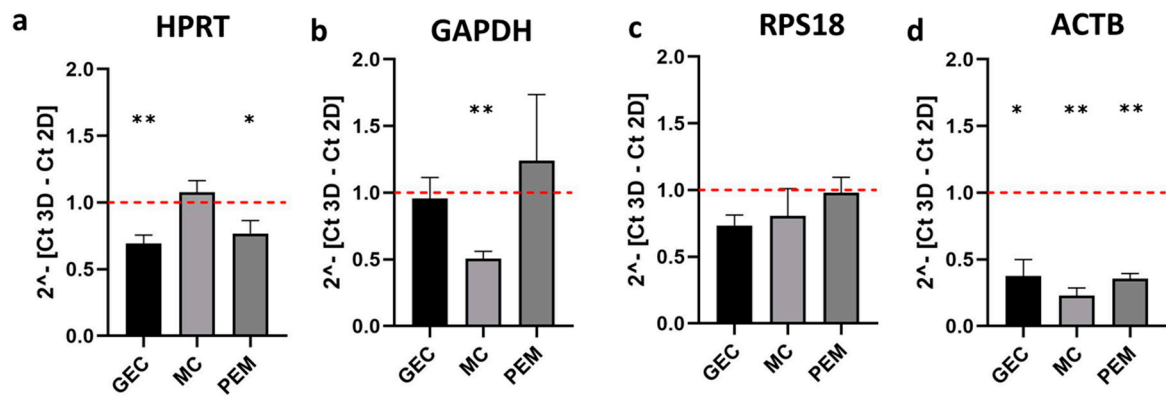

**Supplementary Figure S2: Comparison of gene expression of common housekeeper genes.** Comparison of gene expression of *HPRT* (a), *GAPDH* (b), *RPS18* (c) and *ACTB* (d) in 3D versus 2D monoculture glomerular endothelial cells and mesangial cells and co-cultures of glomerular endothelial cells, mesangial cells and podocytes. Data are given as fold change of 3D condition compared to 2D.  $n = 20$  for *HPRT*,  $n = 4$  for *GAPDH*,  $n=3$  for *RPS18* and *ACTB*. Data are given as mean  $\pm$  SEM, \*  $p < 0.05$ , \*\*  $p < 0.01$ .

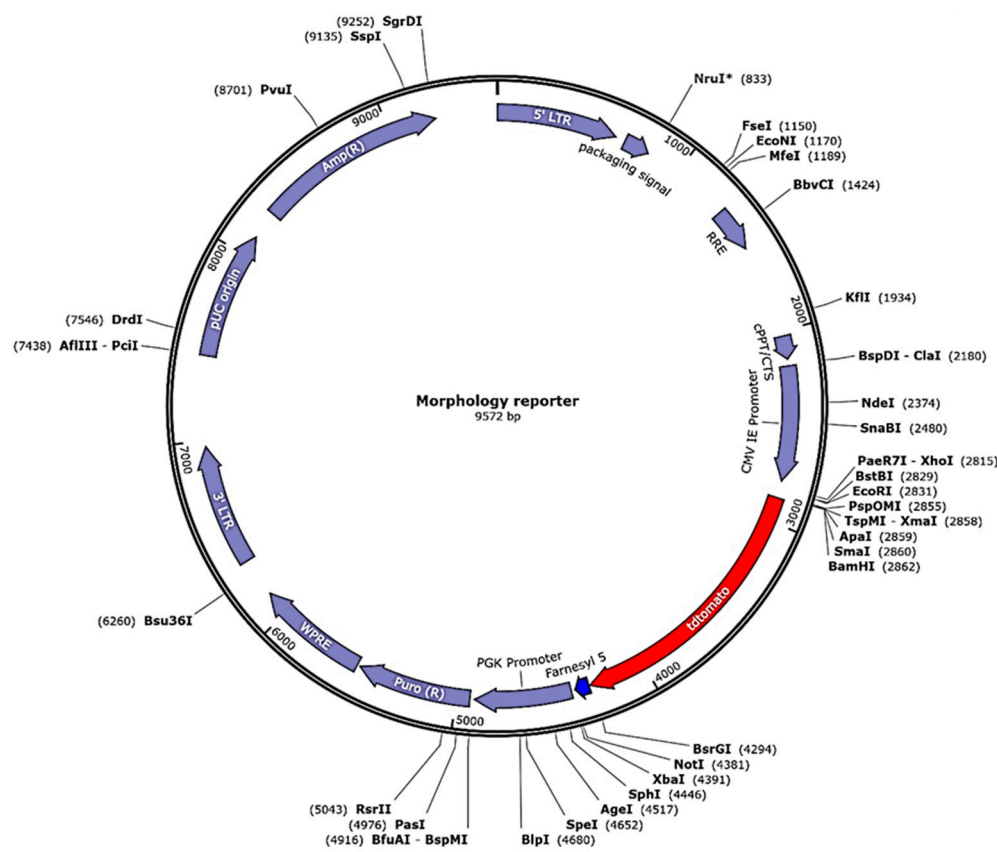

**Supplementary Figure S3: Plasmid map of morphology reporter.** Plasmid map of lentiviral transfer vector that carries the sequence for a tdTomato protein with an additional farnesylation signal. The farnesylation of the tdTomato protein leads to its incorporation into the plasma membrane and makes it possible to assess cell morphology. \*: This site is blocked by Dam methylation.

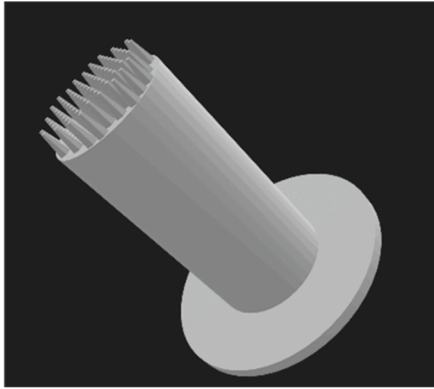

**Supplementary Figure S4:** *Negative mould of the agarose micro-wells.* Computer aided design projected model for moulds with 131micro-wells. The negatives are 3D-printed from resin FotoDent®. The radius of the 131 micro pillars is 1 mm each at the widest position.
